# Supplementary material for: Synchronous conjugation of i-motif DNA and therapeutic siRNA on the vertexes of tetrahedral DNA nanocages for efficient gene silence
Source: PubMed Central journal article supplement — Acta Pharm Sin B. 2021 Feb 12;11(10):3286–96. doi: 10.1016/j.apsb.2021.02.009 (PMC8546665; doi:10.1016/j.apsb.2021.02.009), 2021-02-12
Supplement: mmc1.pdf [file mmc1.pdf]

## Supporting Information for

### ORIGINAL ARTICLE

# Synchronous conjugation of i-motif DNA and therapeutic siRNA on the vertexes of tetrahedral DNA nanocages for efficient gene silence

Xiu Han<sup>a,b,†</sup>, Xiang Xu<sup>a,†</sup>, Ziheng Wu<sup>c</sup>, Zhenghong Wu<sup>a,\*</sup>, Xiaole Qi<sup>a,\*</sup>

<sup>a</sup>*Key Laboratory of Modern Chinese Medicines, China Pharmaceutical University, Nanjing 210009, China*

<sup>b</sup>*Medical School of Nanjing University, Nanjing University, Nanjing 210093, China*

<sup>c</sup>*Parkville Campus, Monash University, VIC 3052, Australia*

Received 20 September 2020; received in revised form 9 November 2020; accepted 12 December 2020

\*Corresponding authors. Tel.: +86 15062208341 (Zhenghong Wu); +86 15996229832 (Xiaole Qi).

E-mail addresses: zhenghongwu66@cpu.edu.cn (Zhenghong Wu), qixiaole523@cpu.edu.cn (Xiaole Qi).

†These authors made equal contributions to this work.

## Oligonucleotides

The tetrahedrons were designed from Turberfield and co-workers which had 20 bp on each side along with an overhang (double strands) for siRNA hybridization and a linker (single strand) for X hybridization<sup>1,2</sup>. The sequences for Td backbones (A, B, C, D) were showed in Table S2. Each edge of the tetrahedron was identified by the same color. The sequences (5'-TTTTTTT-3' and 5'-AAAAAAA-3') were used as an overhang. Different numbers of T were used as linkers for X hybridization. The strategy for aX-Td@bsiRNA formation was displayed in Table S1.

**Table S1** DNA strands for aX-Td@bsiRNA formation.

| aX-Td@bsiRNA | Strand                 | Component of strands (5'–3') |
|--------------|------------------------|------------------------------|
| X-Td@3siRNA  | A <sub>1</sub>         | A-linker-Y                   |
|              | B <sub>1</sub>         | B-overhang                   |
|              | C <sub>2</sub>         | overhang-C                   |
|              | D <sub>1</sub>         | D-overhang                   |
|              | Y'                     | Y'                           |
|              | Antisense <sub>1</sub> | Antisense-overhang           |
|              | Sense                  | Sense                        |
| 2X-Td@2siRNA | A <sub>1</sub>         | A-linker-Y                   |
|              | B <sub>1</sub>         | B-overhang                   |
|              | C <sub>1</sub>         | Y-linker-C                   |
|              | D <sub>1</sub>         | D-overhang                   |
|              | Y'                     | Y'                           |
|              | Antisense <sub>1</sub> | Antisense-overhang           |
|              | Sense                  | Sense                        |
| 3X-Td@siRNA  | A <sub>1</sub>         | A-linker-Y                   |
|              | B <sub>2</sub>         | B-linker-Y                   |
|              | C <sub>1</sub>         | Y-linker-C                   |
|              | D <sub>1</sub>         | D-overhang                   |
|              | Y'                     | Y'                           |
|              | Antisense <sub>1</sub> | Antisense-overhang           |
|              | sense                  | sense                        |

**Table S2** DNA sequences.

| Strand                 | Sequences (5'-3')                                                                             |
|------------------------|-----------------------------------------------------------------------------------------------|
| A                      | CGTATCACCAGGCAGTTGAGACGAACATTCCTAAGTCTGAAATTTATCACCCGCCATAGTAG                                |
| B                      | CGATTACAGCTTGCTACACGATTCAGACTTAGGAATGTTGACATGCGAGGGTCCAATACCG                                 |
| C                      | CGTGTAGCAAGCTGTAATCGACGGGAAGAGCATGCCCATCCACTACTATGGCGGGTGATAAA                                |
| D                      | CTCAACTGCCTGGTGATACGAGGATGGGCATGCTCTTCCCGACGGTATTGGACCCTCGCATG                                |
| A <sub>1</sub>         | CGTATCACCAGGCAGTTGAGACGAACATTCCTAAGTCTGAAATTTATCACCCGCCATAGTAGTTTCCCAATCCCAATCCC<br>AATCCC    |
| B <sub>1</sub>         | CGATTACAGCTTGCTACACGATTCAGACTTAGGAATGTTGACATGCGAGGGTCCAATACCGTTTTTTTT                         |
| B <sub>2</sub>         | CGATTACAGCTTGCTACACGATTCAGACTTAGGAATGTTGACATGCGAGGGTCCAATACCGTTTTCCCAATCCCAATCCC<br>AATCCC    |
| C <sub>1</sub>         | CCCAATCCCAATCCCAATCCCTTTTTTCGTGTAGCAAGCTGTAATCGACGGGAAGAGCATGCCCATCCACTACTATGGCG<br>GGTGATAAA |
| C <sub>2</sub>         | TTTTTTTCGTGTAGCAAGCTGTAATCGACGGGAAGAGCATGCCCATCCACTACTATGGCGGGTGATAAA                         |
| D <sub>1</sub>         | CTCAACTGCCTGGTGATACGAGGATGGGCATGCTCTTCCCGACGGTATTGGACCCTCGCATGTTTTTTTT                        |
| Antisense              | AUUUCUCAUGGGCAGCUCCdTdT <sup>3</sup>                                                          |
| Antisense <sub>1</sub> | AUUUCUCAUGGGCAGCUCCdTdTAAAAAAA                                                                |
| Sense                  | GGAGCUGCCCAUGAGAAAUdTdT <sup>3</sup>                                                          |
| Y                      | CCCAATCCCAATCCCAATCCC <sup>4</sup>                                                            |
| Y'                     | GGGATTGGGATTGGGATTGGG <sup>4</sup>                                                            |

**Table S3** Sizes and zeta potentials of aX-Td@bsiRNA.

| Sample       | pH  | Size (nm)    | PDI         | Zeta potential (mV) |
|--------------|-----|--------------|-------------|---------------------|
| Td           | 7.4 | 19.62 ± 2.36 | 0.97 ± 0.05 | -7.25 ± 0.07        |
|              | 5.5 | 20.69 ± 5.00 | 0.94 ± 0.07 | -7.27 ± 0.24        |
| X-Td@3siRNA  | 7.4 | 26.46 ± 3.50 | 0.75 ± 0.03 | -19.37 ± 0.84       |
|              | 5.5 | 24.64 ± 1.82 | 0.72 ± 0.02 | -10.63 ± 0.92       |
| 2X-Td@2siRNA | 7.4 | 27.35 ± 2.88 | 0.44 ± 0.02 | -19.50 ± 1.22       |
|              | 5.5 | 23.44 ± 1.73 | 0.54 ± 0.15 | -8.71 ± 0.15        |
| 3X-Td@siRNA  | 7.4 | 26.16 ± 8.46 | 0.72 ± 0.16 | -10.63 ± 1.16       |
|              | 5.5 | 26.59 ± 1.43 | 0.27 ± 0.01 | -9.33 ± 1.11        |

Data are presented as mean±SD,  $n=3$ .

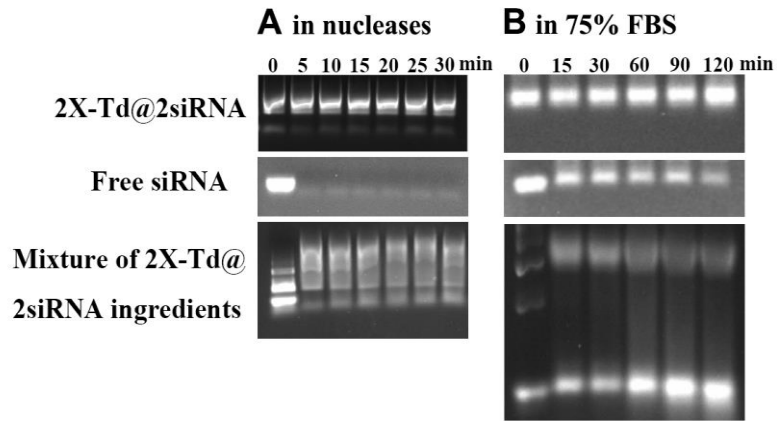

**Figure S1** Stability of 2X-Td@2siRNA, free siRNA and mixture of 2X-Td@2siRNA strands in nucleases (100 U DNase and 5 mg/mL RNase) and 75% FBS incubating for different time at 37 °C.

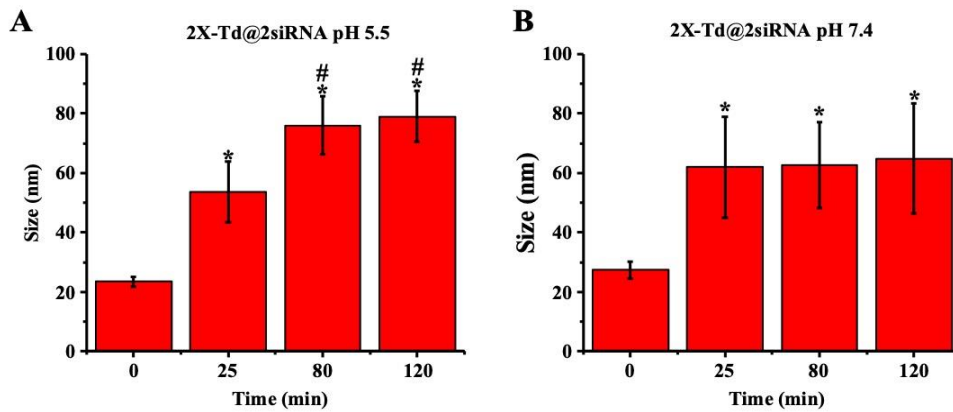

**Figure S2** The particle size changes of 2X-Td@2siRNA (A) in pH 5.5 PBS. The significance of the differences ( $*P < 0.05$  versus 0 min,  $\#P < 0.05$  versus 25 min) was evaluated by two-tailed Student's *t*-test. (B) in pH 7.4 PBS. The significance of the differences ( $*P < 0.05$  versus 0 min) was evaluated by two-tailed Student's *t*-test.

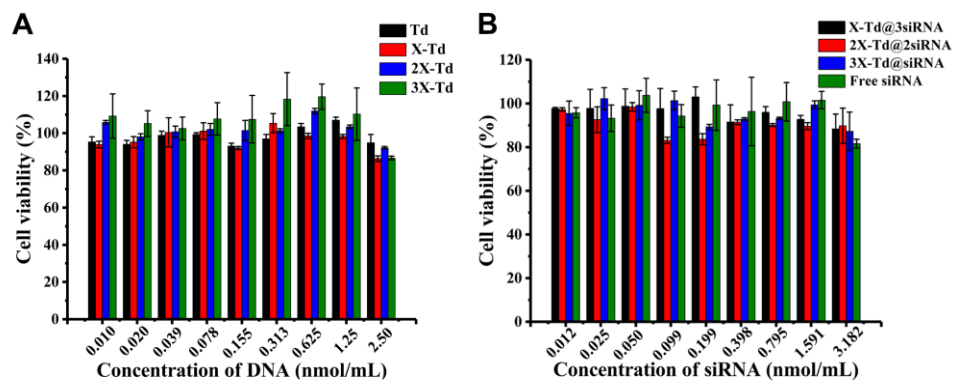

**Figure S3** Cell viability of A549 cells treated with A) empty cages (aX-Td), and B) siRNA loaded DNA nanocages (aX-Td@bsiRNA) with increasing concentrations after 48 h.

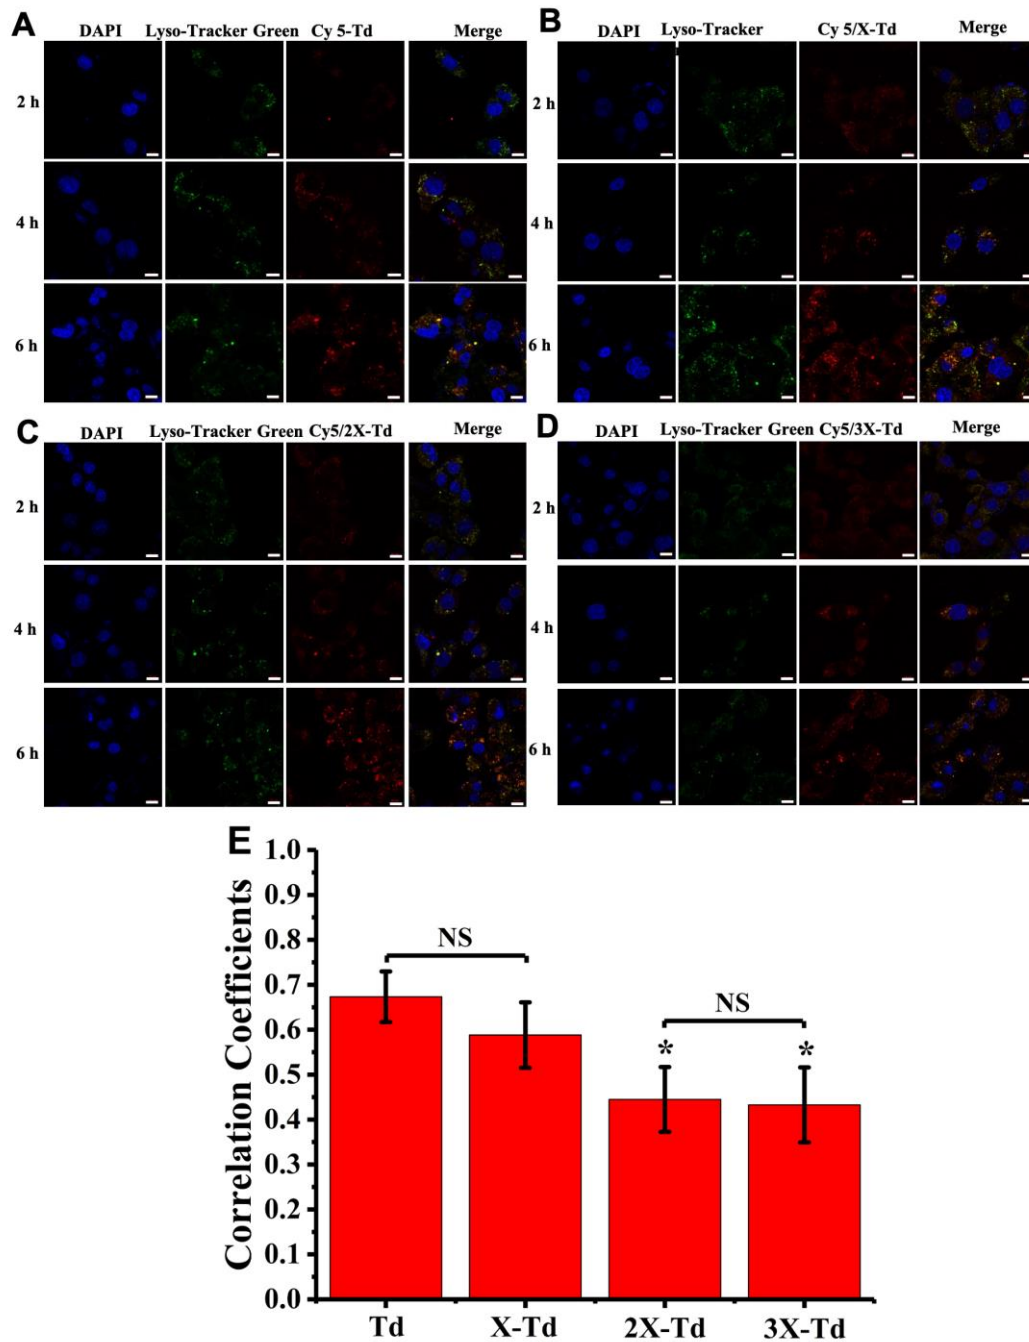

**Figure S4** Endosomal escape behavior of Td (A), X-Td (B), 2X-Td (C) and 3X-Td (D) in A549 cells at different times analyzed by confocal laser scanning microscopy. The scale bar is 10  $\mu$ m. (E) The Pearson correlation coefficients between Cy 5 and endosomes at 6 h were calculated by Image J software. The significance of the differences ( $*P < 0.05$  versus Td group) was evaluated by two-tailed Student's *t*-test.

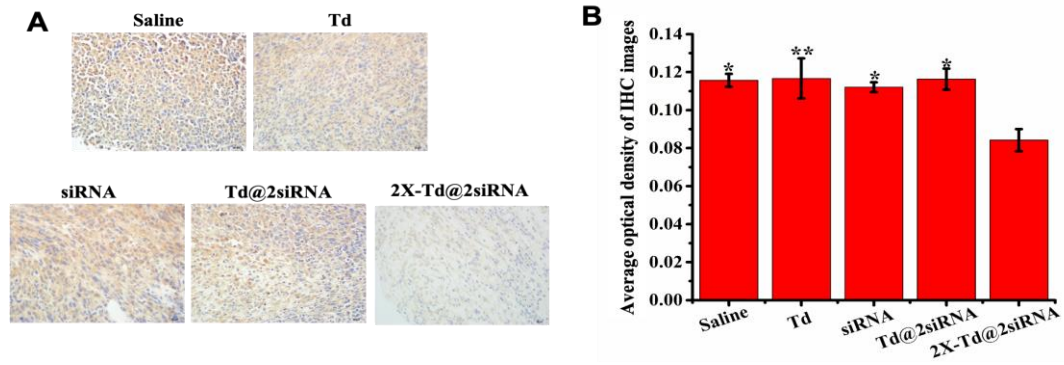

**Figure S5** EGFR protein expression quantification (A) Immunohistochemistry (IHC) images of the tumors collected from different groups of mice after 12 days injection treatments (400 ×). (B) Average optical density of IHC images quantified by Image J. The significance of the differences (\*\* $P < 0.01$ , \* $P < 0.05$  versus 2X-Td@2siRNA group) was evaluated by two-tailed Student's *t*-test ( $n = 3$ )

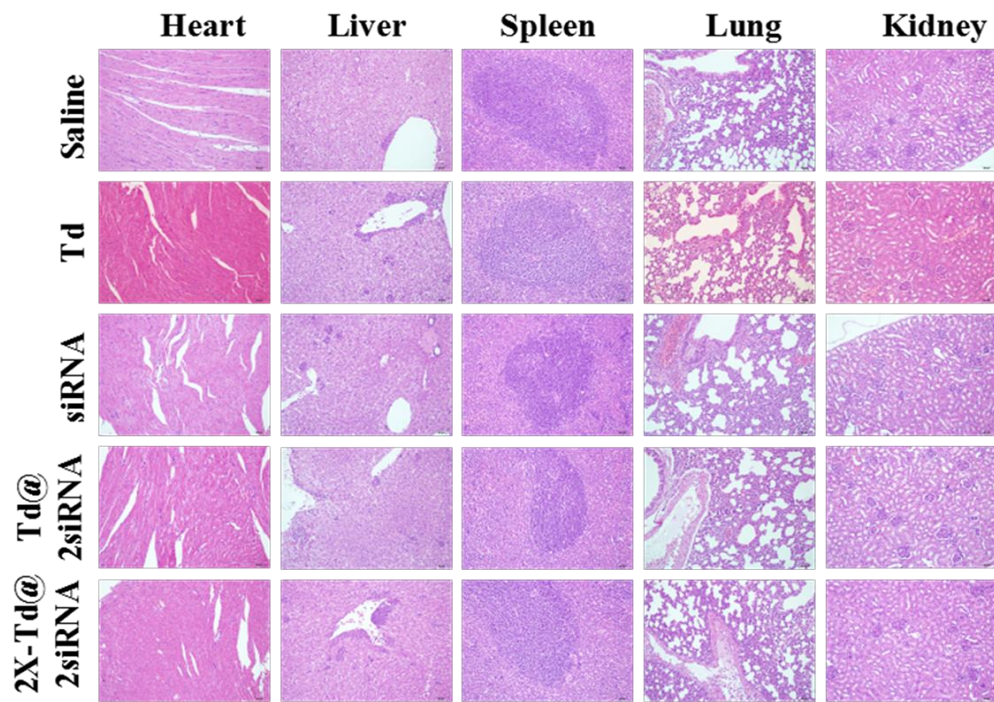

**Figure S6** H&E staining of main organs collected from different groups of mice after 12 days injection treatments (200 ×).

## References

- 1 Goodman RP, Schaap IAT, Tardin CF, Erben CM, Berry RM, Schmidt CF, et al. Rapid chiral assembly of rigid DNA building blocks for molecular nanofabrication. *Science* 2005;**310**:1661-5.
- 2 Goodman RP, Berry RM, Turberfield AJ. The single-step synthesis of a DNA tetrahedron. *Chem Commun* 2004;**12**: 1372-3.
- 3 Zhang M, Zhang X, Bai CX, Wei MQ. Inhibition of epidermal growth factor receptor expression by RNA interference in A549 cells. *Acta Pharmacol Sin* 2004;**25**: 61-7.
- 4 Liu DS, Balasubramanian S. A proton-fuelled DNA nanomachine. *Angew Chem Int Ed* 2003;**42**: 5734-6.
